# Supplementary material for: Theoretical Analysis and Expression Profiling of 17β-Hydroxysteroid Dehydrogenase Genes in Gonadal Development and Steroidogenesis of Leopard Coral Grouper (Plectropomus leopardus)
Source: MDPI journal article supplement (doi:10.3390/ijms25042180), 2024-02-11
Supplement: s1 [file s1]

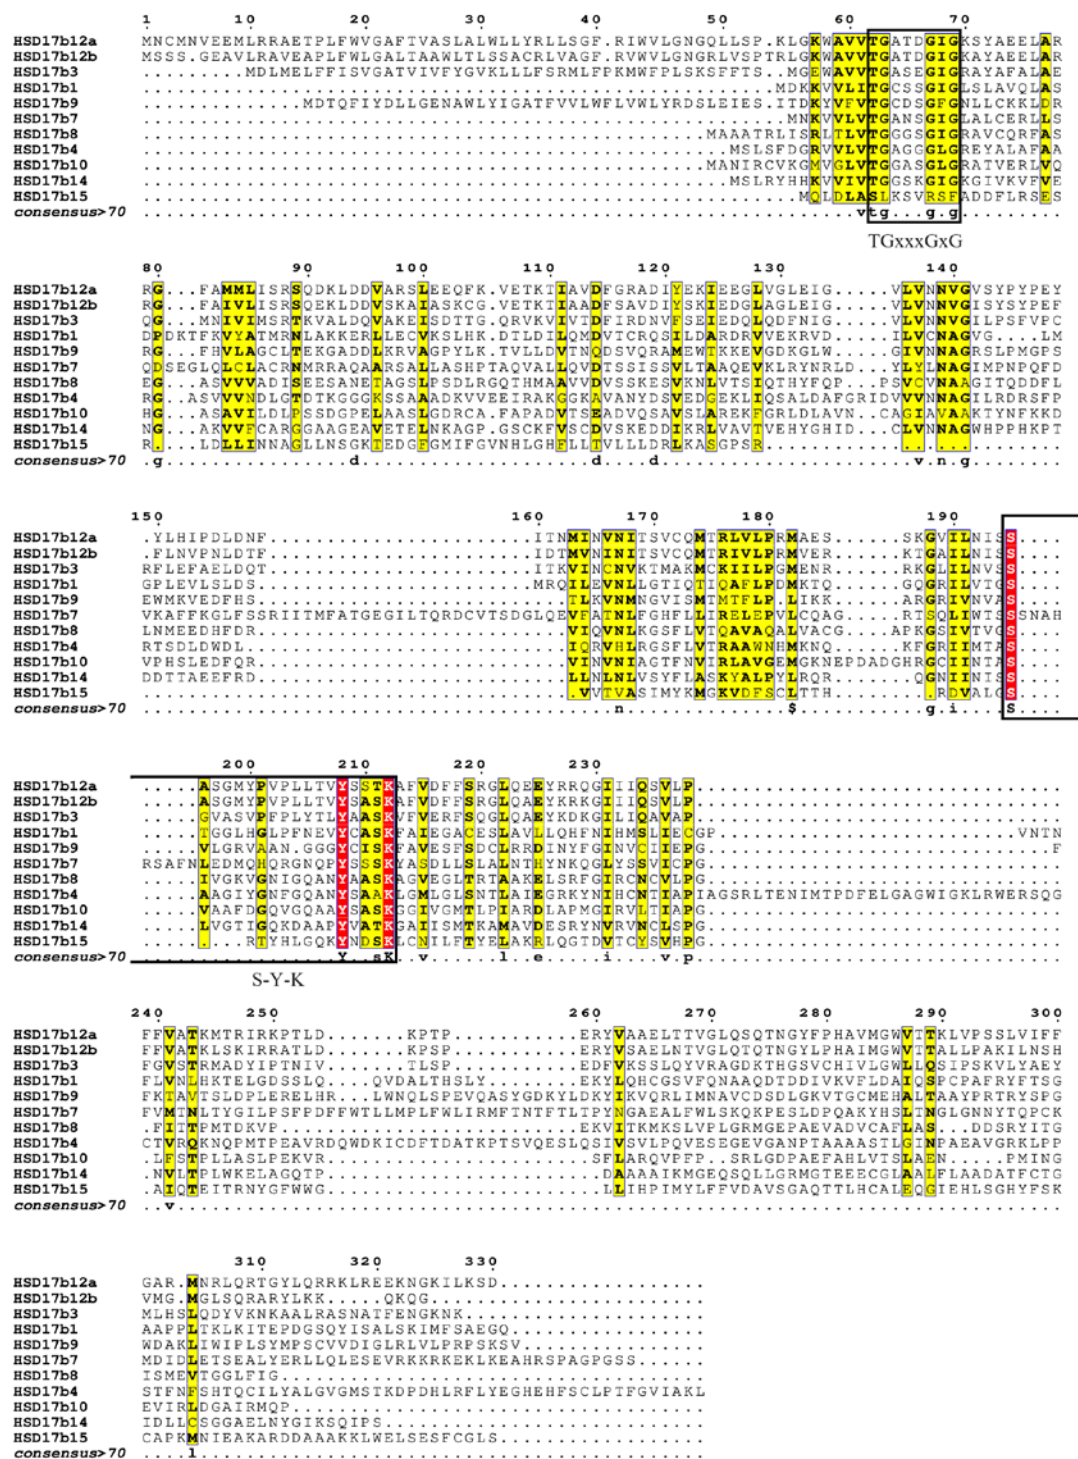

Figure S1. Amino Acid Alignment of the Hsd17b Gene Family in *P. leopardus*.  
Note: Red indicates high sequence similarity, yellow indicates medium similarity.

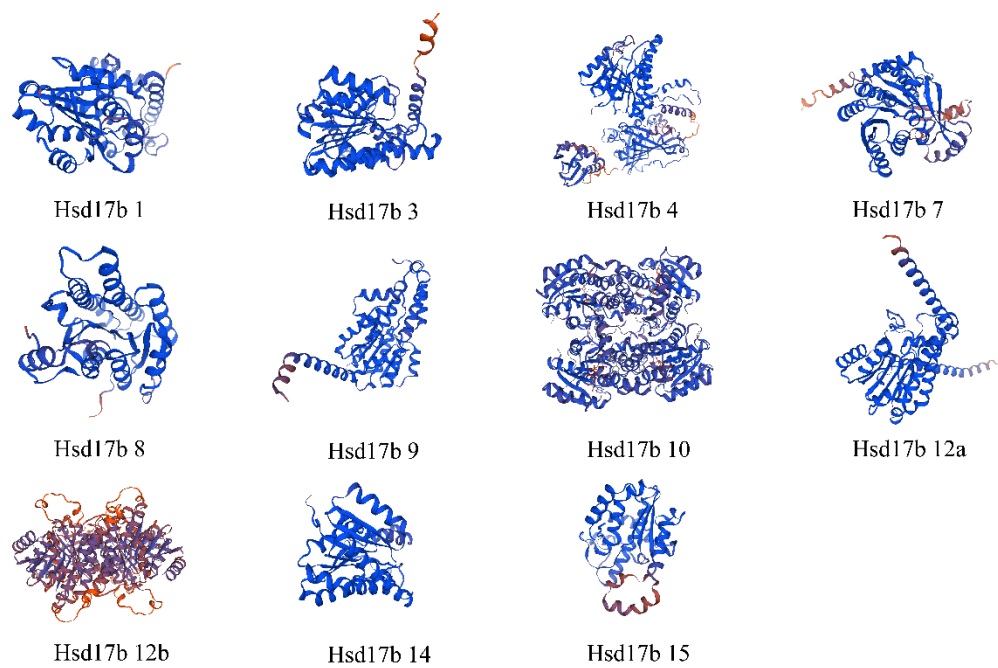

Figure S2. The protein structure of the flounder Hsd17b family genes in *P. leopardus*.

The proteins modeling was made by SWISS-MODEL

Table S1. All species Hsd17b sequences used for phylogenetic tree construction.

| Gene    | Species                        | GenBank accession | Gene      | Species                        | GenBank accession |
|---------|--------------------------------|-------------------|-----------|--------------------------------|-------------------|
| hsd17b1 | <i>Homo sapiens</i>            | NP_000404.2       | hsd17b8   | <i>Larimichthys crocea</i>     | XP_027142483.1    |
| hsd17b1 | <i>Mus musculus</i>            | NP_034605.1       | hsd17b8   | <i>Oreochromis niloticus</i>   | NP_001266465.1    |
| hsd17b1 | <i>Gallus gallus</i>           | NP_990168.1       | hsd17b8   | <i>Epinephelus lanceolatus</i> | XP_033492268.1    |
| hsd17b1 | <i>Xenopus tropicalis</i>      | XP_002935954.1    | hsd17b8   | <i>Plectropomus leopardus</i>  | XP_042362813.1    |
| hsd17b1 | <i>Danio rerio</i>             | NP_991147.2       | hsd17b8   | <i>Cyprinus carpio</i>         | XP_042611619.1    |
| hsd17b1 | <i>Paralichthys olivaceus</i>  | XP_019950004.1    | hsd17b9   | <i>Homo sapiens</i>            | AAC50725.1        |
| hsd17b1 | <i>Scophthalmus maximus</i>    | XP_035469907.1    | hsd17b9   | <i>Mus musculus</i>            | NP_598767.1       |
| hsd17b1 | <i>Lepisosteus oculatus</i>    | XP_015217570.1    | hsd17b9   | <i>Gallus gallus</i>           | AAG00507.1        |
| hsd17b1 | <i>Oryzias latipes</i>         | XP_004071345.1    | hsd17b9   | <i>Xenopus tropicalis</i>      | XP_012812319.1    |
| hsd17b1 | <i>Larimichthys crocea</i>     | XP_010737963.1    | hsd17b9   | <i>Danio rerio</i>             | NP_001025272.1    |
| hsd17b1 | <i>Oreochromis niloticus</i>   | XP_025761987.1    | hsd17b9   | <i>Paralichthys olivaceus</i>  | XP_019952170.1    |
| hsd17b1 | <i>Epinephelus lanceolatus</i> | XP_033501630.1    | hsd17b9   | <i>Scophthalmus maximus</i>    | XP_035488322.1    |
| hsd17b1 | <i>Plectropomus leopardus</i>  | XP_042361394.1    | hsd17b9   | <i>Lepisosteus oculatus</i>    | XP_006629411.1    |
| hsd17b1 | <i>Cyprinus carpio</i>         | XP_042576382.1    | hsd17b9   | <i>Oryzias latipes</i>         | XP_004068760.1    |
| hsd17b2 | <i>Homo sapiens</i>            | NP_002144.1       | hsd17b9   | <i>Larimichthys crocea</i>     | XP_027135011.1    |
| hsd17b2 | <i>Mus musculus</i>            | NP_032316.2       | hsd17b9   | <i>Oreochromis niloticus</i>   | XP_003456138.1    |
| hsd17b2 | <i>Gallus gallus</i>           | XP_040537274.1    | hsd17b9   | <i>Epinephelus lanceolatus</i> | XP_033482037.1    |
| hsd17b2 | <i>Xenopus tropicalis</i>      | XP_002934996.2    | hsd17b9   | <i>Plectropomus leopardus</i>  | XP_042357765.1    |
| hsd17b2 | <i>Danio rerio</i>             | NP_001035278.1    | hsd17b10  | <i>Homo sapiens</i>            | NP_004484.1       |
| hsd17b2 | <i>Scophthalmus maximus</i>    | XP_035497265.2    | hsd17b10  | <i>Mus musculus</i>            | NP_058043.3       |
| hsd17b2 | <i>Lepisosteus oculatus</i>    | XP_015223426.1    | hsd17b10  | <i>Gallus gallus</i>           | XP_015128618.1    |
| hsd17b2 | <i>Larimichthys crocea</i>     | XP_010753727.1    | hsd17b10  | <i>Xenopus tropicalis</i>      | NP_001016511.1    |
| hsd17b2 | <i>Epinephelus lanceolatus</i> | XP_033491713.1    | hsd17b10  | <i>Danio rerio</i>             | NP_001006098.1    |
| hsd17b3 | <i>Homo sapiens</i>            | NP_000188.1       | hsd17b10  | <i>Paralichthys olivaceus</i>  | XP_019967526.1    |
| hsd17b3 | <i>Mus musculus</i>            | NP_032317.2       | hsd17b10  | <i>Scophthalmus maximus</i>    | XP_035501223.1    |
| hsd17b3 | <i>Gallus gallus</i>           | XP_425046.4       | hsd17b10  | <i>Oryzias latipes</i>         | XP_004071072.1    |
| hsd17b3 | <i>Xenopus tropicalis</i>      | XP_012827001.1    | hsd17b10  | <i>Larimichthys crocea</i>     | XP_010740929.1    |
| hsd17b3 | <i>Danio rerio</i>             | NP_956658.1       | hsd17b10  | <i>Oreochromis niloticus</i>   | XP_003457109.1    |
| hsd17b3 | <i>Paralichthys olivaceus</i>  | XP_019958261.1    | hsd17b10  | <i>Epinephelus lanceolatus</i> | XP_033484829.1    |
| hsd17b3 | <i>Scophthalmus maximus</i>    | XP_035494692.1    | hsd17b10  | <i>Plectropomus leopardus</i>  | XP_042347951.1    |
| hsd17b3 | <i>Lepisosteus oculatus</i>    | XP_015224346.1    | hsd17b10  | <i>Cyprinus carpio</i>         | XP_042568890.1    |
| hsd17b3 | <i>Oryzias latipes</i>         | XP_004072273.2    | hsd17b11  | <i>Homo sapiens</i>            | NP_057329.3       |
| hsd17b3 | <i>Larimichthys crocea</i>     | XP_010731296.2    | hsd17b11  | <i>Mus musculus</i>            | NP_444492.1       |
| hsd17b3 | <i>Oreochromis niloticus</i>   | XP_003446190.1    | hsd17b11  | <i>Gallus gallus</i>           | XP_040525634.1    |
| hsd17b3 | <i>Epinephelus lanceolatus</i> | XP_033476201.1    | hsd17b12a | <i>Homo sapiens</i>            | NP_057226.1       |
| hsd17b3 | <i>Plectropomus leopardus</i>  | XP_042344332.1    | hsd17b12a | <i>Mus musculus</i>            | NP_062631.1       |
| hsd17b4 | <i>Homo sapiens</i>            | NP_001186220.1    | hsd17b12a | <i>Gallus gallus</i>           | XP_015142684.1    |
| hsd17b4 | <i>Mus musculus</i>            | NP_032318.2       | hsd17b12a | <i>Xenopus tropicalis</i>      | NP_001017234.1    |
| hsd17b4 | <i>Gallus gallus</i>           | NP_990274.1       | hsd17b12a | <i>Danio rerio</i>             | XP_021332236.1    |
| hsd17b4 | <i>Xenopus tropicalis</i>      | NP_001027490.1    | hsd17b12a | <i>Paralichthys olivaceus</i>  | XP_019934956.1    |

|         |                           |                |           |                           |                |
|---------|---------------------------|----------------|-----------|---------------------------|----------------|
| hsd17b4 | Danio rerio               | NP_956430.1    | hsd17b12a | Scophthalmus maximus      | XP_035499246.1 |
| hsd17b4 | Paralichthys olivaceus    | XP_019954878.1 | hsd17b12a | Lepisosteus oculatus      | XP_006642505.1 |
| hsd17b4 | Scophthalmus maximus      | XP_035494587.2 | hsd17b12a | Oryzias latipes           | XP_004069451.1 |
| hsd17b4 | Lepisosteus oculatus      | XP_015222853.1 | hsd17b12a | Larimichthys crocea       | XP_027143858.1 |
| hsd17b4 | Oryzias latipes           | XP_023814070.1 | hsd17b12a | Oreochromis niloticus     | NP_001266727.1 |
| hsd17b4 | Larimichthys crocea       | XP_010731495.3 | hsd17b12a | Epinephelus lanceolatus   | XP_033490786.1 |
| hsd17b4 | Oreochromis niloticus     | XP_003451110.1 | hsd17b12a | Plectropomus leopardus    | XP_042352113.1 |
| hsd17b4 | Epinephelus lanceolatus   | XP_033475201.1 | hsd17b12a | Cyprinus carpio           | XP_042608972.1 |
| hsd17b4 | Plectropomus leopardus    | XP_042344065.1 | hsd17b12b | Danio rerio               | NP_955907.1    |
| hsd17b4 | Cyprinus carpio           | XP_042585087.1 | hsd17b12b | Paralichthys olivaceus    | XP_019954998.1 |
| hsd17b5 | Homo sapiens              | NP_001240837.1 | hsd17b12b | Scophthalmus maximus      | XP_035484405.1 |
| hsd17b5 | <i>Mus musculus</i>       | NP_085114.1    | hsd17b12b | Oryzias latipes           | XP_011485867.1 |
| hsd17b6 | Homo sapiens              | NP_003716.2    | hsd17b12b | Larimichthys crocea       | XP_027137350.1 |
| hsd17b6 | <i>Mus musculus</i>       | NP_038814.1    | hsd17b12b | Oreochromis niloticus     | XP_003450847.2 |
| hsd17b7 | Homo sapiens              | NP_057455.1    | hsd17b12b | Epinephelus lanceolatus   | XP_033477993.1 |
| hsd17b7 | <i>Mus musculus</i>       | NP_034606.3    | hsd17b12b | Plectropomus leopardus    | XP_042346655.1 |
| hsd17b7 | <i>Gallus gallus</i>      | NP_001264435.1 | hsd17b13  | Homo sapiens              | NP_835236.2    |
| hsd17b7 | <i>Xenopus tropicalis</i> | XP_031755934.1 | hsd17b13  | <i>Mus musculus</i>       | NP_001156958.1 |
| hsd17b7 | Danio rerio               | NP_001070796.1 | hsd17b13  | <i>Gallus gallus</i>      | XP_040525633.1 |
| hsd17b7 | Paralichthys olivaceus    | XP_019936533.1 | hsd17b14  | Homo sapiens              | NP_057330.2    |
| hsd17b7 | Scophthalmus maximus      | XP_035491323.1 | hsd17b14  | <i>Mus musculus</i>       | NP_079606.3    |
| hsd17b7 | Lepisosteus oculatus      | XP_006634994.2 | hsd17b14  | <i>Xenopus tropicalis</i> | XP_002935043.1 |
| hsd17b7 | Oryzias latipes           | XP_011472673.1 | hsd17b14  | Danio rerio               | NP_001003521.1 |
| hsd17b7 | Larimichthys crocea       | XP_027146397.1 | hsd17b14  | Paralichthys olivaceus    | XP_019950102.1 |
| hsd17b7 | Oreochromis niloticus     | XP_003439749.1 | hsd17b14  | Scophthalmus maximus      | XP_047183973.1 |
| hsd17b7 | Epinephelus lanceolatus   | XP_033476979.1 | hsd17b14  | Oryzias latipes           | XP_004071213.1 |
| hsd17b7 | Plectropomus leopardus    | XP_042339482.1 | hsd17b14  | Larimichthys crocea       | XP_010744565.3 |
| hsd17b7 | Cyprinus carpio           | XP_042582004.1 | hsd17b14  | Oreochromis niloticus     | XP_003442566.1 |
| hsd17b8 | Homo sapiens              | NP_055049.1    | hsd17b14  | Epinephelus lanceolatus   | XP_033499738.1 |
| hsd17b8 | <i>Mus musculus</i>       | NP_038571.2    | hsd17b14  | Plectropomus leopardus    | XP_042360641.1 |
| hsd17b8 | <i>Xenopus tropicalis</i> | NP_001016671.1 | hsd17b15  | Homo sapiens              | NP_057110.3    |
| hsd17b8 | Danio rerio               | NP_001005292.2 | hsd17b15  | <i>Mus musculus</i>       | NP_067532.2    |
| hsd17b8 | Paralichthys olivaceus    | XP_019963159.1 | hsd17b15  | Paralichthys olivaceus    | XP_019963127.1 |
| hsd17b8 | Scophthalmus maximus      | XP_035477126.1 | hsd17b15  | Plectropomus leopardus    | XP_042370756.1 |
| hsd17b8 | Oryzias latipes           | XP_004074105.1 |           |                           |                |

---

Table S2. Sequences of primers used in the study.

| Purpose          | 5' to 3' Sequence                               |
|------------------|-------------------------------------------------|
| Hsd17b4-ISH-Fw   | ATTTAGGTGACACTATAGAAGAGCAGCTATGATG<br>GATGGCGGT |
| Hsd17b4-ISH-Rv   | TAATACGACTCACTATAGGGAGAAGGACATGTCTT<br>GCAGCGAA |
| Hsd17b12a-ISH-Fw | ATTTAGGTGACACTATAGAAGAGATGACTCGCATC<br>AGGAAGCC |
| Hsd17b12a-ISH-Rv | TAATACGACTCACTATAGGGAGAATCAGAGCAGA<br>GTTTGCCGT |
| Vasa-ISH-Fw      | ATTTAGGTGACACTATAGCTGATTCCTCGCCGCT<br>T         |
| Vasa-ISH-Rv      | TAATACGACTCACTATAGGGTGGCTCTTCACACCG<br>TTGTC    |

Table S3. Secondary Structure Prediction of the Hsd17b Gene Family in *P. leopardus*.

| Protein   | Sequence length | Alpha helix (Hh) | Extended strand (Ee) | Beta turn (Tt) | Random coil (Cc) |
|-----------|-----------------|------------------|----------------------|----------------|------------------|
| Hsd17b1   | 290             | 52.76%           | 15.52%               | 8.62%          | 23.10%           |
| Hsd17b3   | 320             | 49.06%           | 16.88%               | 7.19%          | 26.88%           |
| Hsd17b4   | 734             | 33.11%           | 20.71%               | 8.31%          | 37.87%           |
| Hsd17b7   | 348             | 41.09%           | 15.23%               | 6.61%          | 37.07%           |
| Hsd17b8   | 256             | 44.53%           | 21.48%               | 8.59%          | 25.39%           |
| Hsd17b9   | 332             | 52.71%           | 13.86%               | 8.13%          | 25.30%           |
| Hsd17b10  | 260             | 39.62%           | 18.85%               | 9.23%          | 32.31%           |
| Hsd17b12a | 330             | 50.00%           | 15.76%               | 6.97%          | 27.27%           |
| Hsd17b12b | 319             | 49.84%           | 17.24%               | 6.58%          | 26.33%           |
| Hsd17b14  | 264             | 39.39%           | 19.70%               | 8.71%          | 32.20%           |
| HSD17b15  | 228             | 47.81%           | 14.47%               | 8.33%          | 29.39%           |

Table S4 The protein information of the Hsd17b Gene Family in *P. leopardus*.

| Protein   | Molecular weight (Da) | Theoretical pI | Grand average of Hydropathicity (GRAVY) | Instability index |
|-----------|-----------------------|----------------|-----------------------------------------|-------------------|
| Hsd17b1   | 31666.66              | 5.8            | 0.096                                   | 37.57             |
| Hsd17b3   | 35609.66              | 8.89           | 0.251                                   | 44.58             |
| Hsd17b4   | 79034.15              | 6.97           | -0.116                                  | 33.25             |
| Hsd17b7   | 38902.59              | 8.6            | -0.15                                   | 38.84             |
| Hsd17b8   | 26611.52              | 5.95           | 0.223                                   | 25.88             |
| Hsd17b9   | 37294.38              | 8.47           | 0.031                                   | 30                |
| Hsd17b10  | 27072.17              | 6.43           | 0.212                                   | 22.47             |
| Hsd17b12a | 37246.39              | 9.44           | -0.002                                  | 43.96             |
| Hsd17b12b | 34674.46              | 9.7            | 0.216                                   | 38.16             |
| Hsd17b14  | 28103.24              | 6.59           | 0.008                                   | 41.54             |
| Hsd17b15  | 25391.26              | 7.67           | 0.027                                   | 40.49             |
